# Supplementary material
Source: MDPI journal article supplement (https://www.mdpi.com/2073-4344/10/7/803)
Supplement: s1 [file s1]

Article

# The Influence of a Surface Treatment of Metallic Titanium on the Photocatalytic Properties of TiO<sub>2</sub> Nanotubes Grown by Anodic Oxidation

Živa Marinko <sup>1,2,\*</sup>, Luka Suhadolnik <sup>1</sup>, Zoran Samardžija <sup>1</sup>, Janez Kovač <sup>3</sup> and Miran Čeh <sup>1</sup>

<sup>1</sup> Department for Nanostructured Materials, Jožef Stefan Institute, Jamova 39, 1000 Ljubljana, Slovenia; luka.suhadolnik@ijs.si (L.S.); zoran.samardzija@ijs.si (Z.S.); miran.ceh@ijs.si (M.Č.)

<sup>2</sup> Jožef Stefan International Postgraduate School, Jamova 39, 1000 Ljubljana, Slovenia

<sup>3</sup> Department of Surface Engineering, Jožef Stefan Institute, Jamova 39, 1000 Ljubljana, Slovenia; janez.kovac@ijs.si (J.K.)

\* Correspondence: ziva.marinko@ijs.si (Ž.M.); Tel.: 00386 1 4773 931

Received: 16 June 2020; Accepted: 16 July 2020; Published: date

## Supporting information

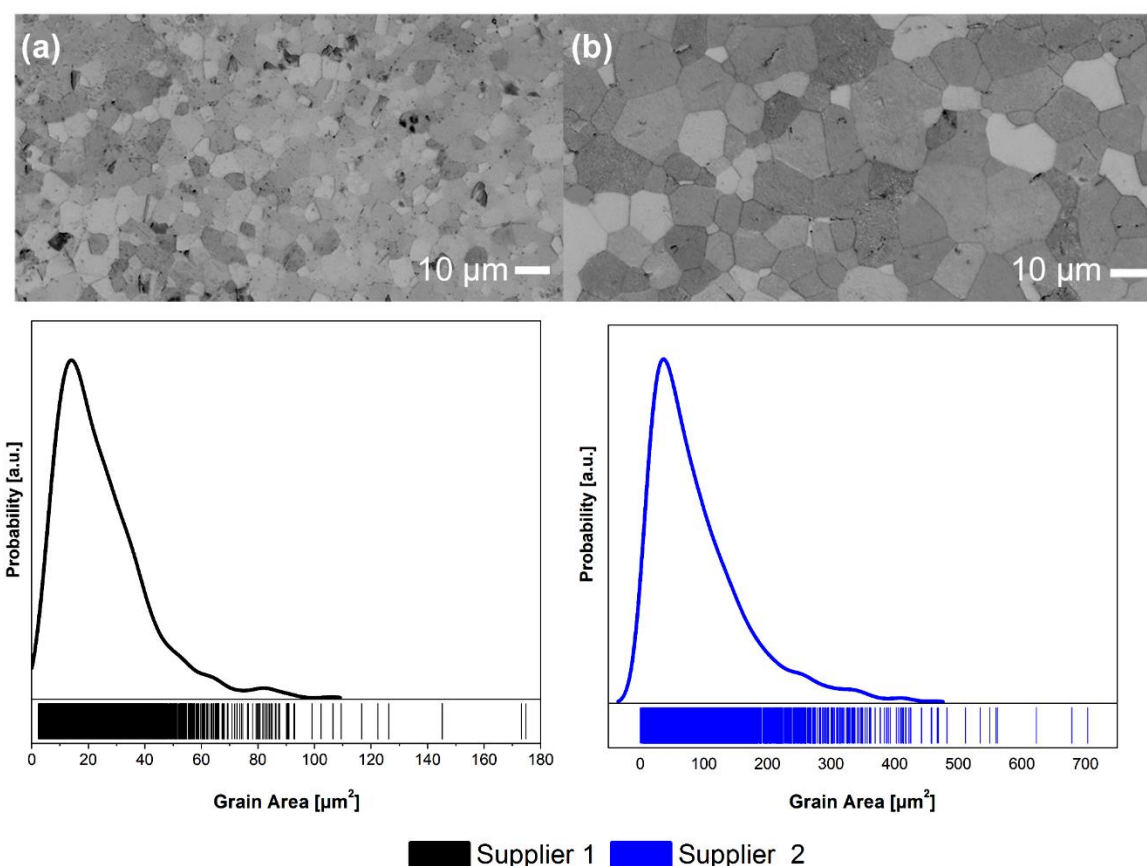

**Figure S1.** Optical microscope micrographs of chemically etched, electropolished titanium surfaces with the corresponding grain-area histogram for both titanium foil suppliers. (a) Titanium foil from Supplier 1 and (b) titanium foil from Supplier 2.

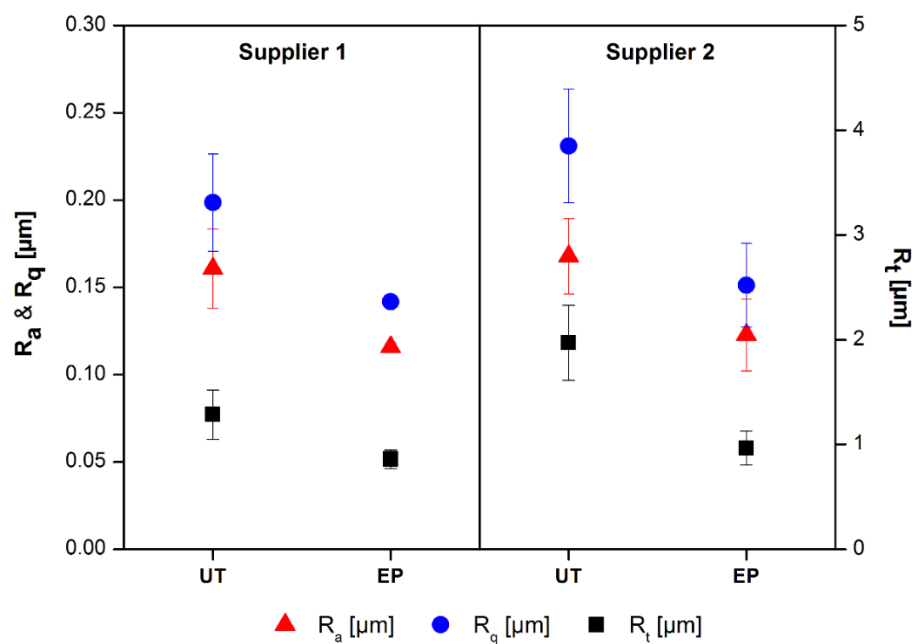

**Figure S2.** Measured roughness factors for both titanium foil suppliers;  $R_a$  – average arithmetical roughness,  $R_q$  – root-mean-square roughness,  $R_t$  – peak-to-valley roughness, UT – untreated, EP – electropolished.

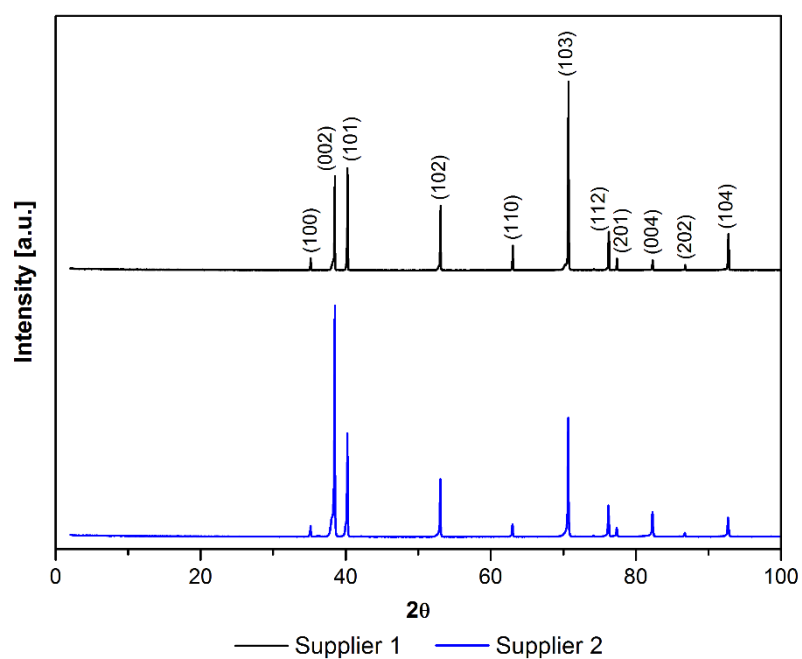

**Figure S3.** XRD pattern for both untreated titanium foils.

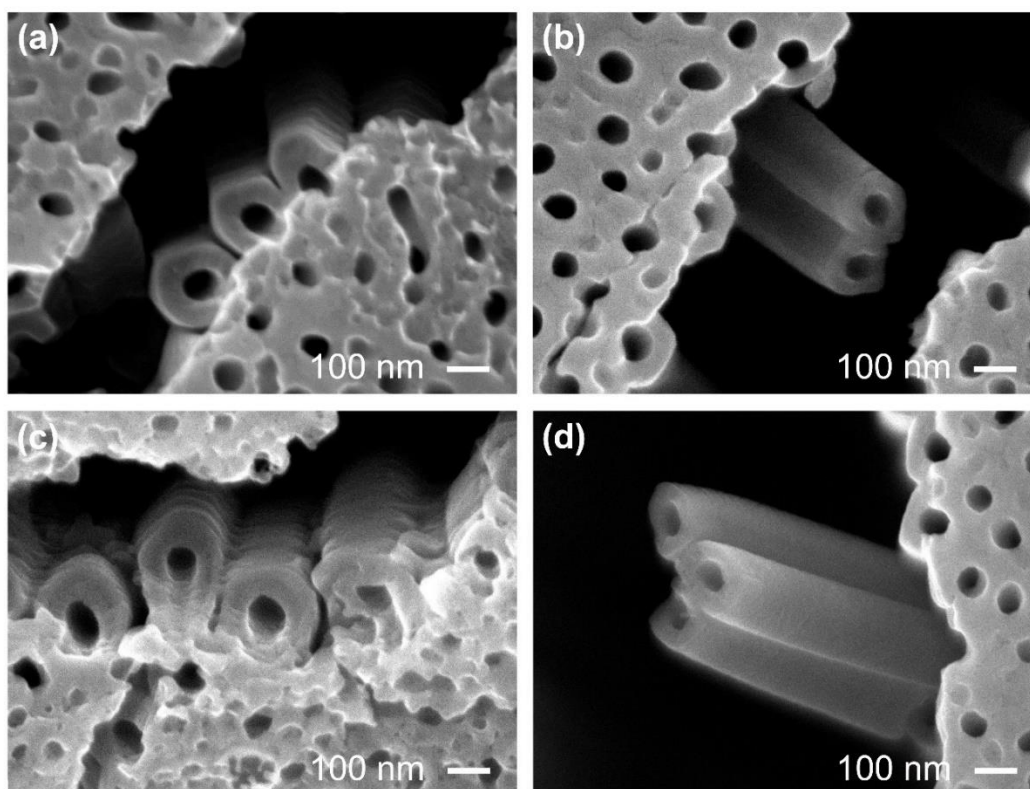

**Figure S4.** SEM micrographs of the anodized and annealed titanium foils showing (a) untreated and (b) electropolished titanium foil from Supplier 1. (c) Untreated and (d) electropolished titanium foil from Supplier 2.

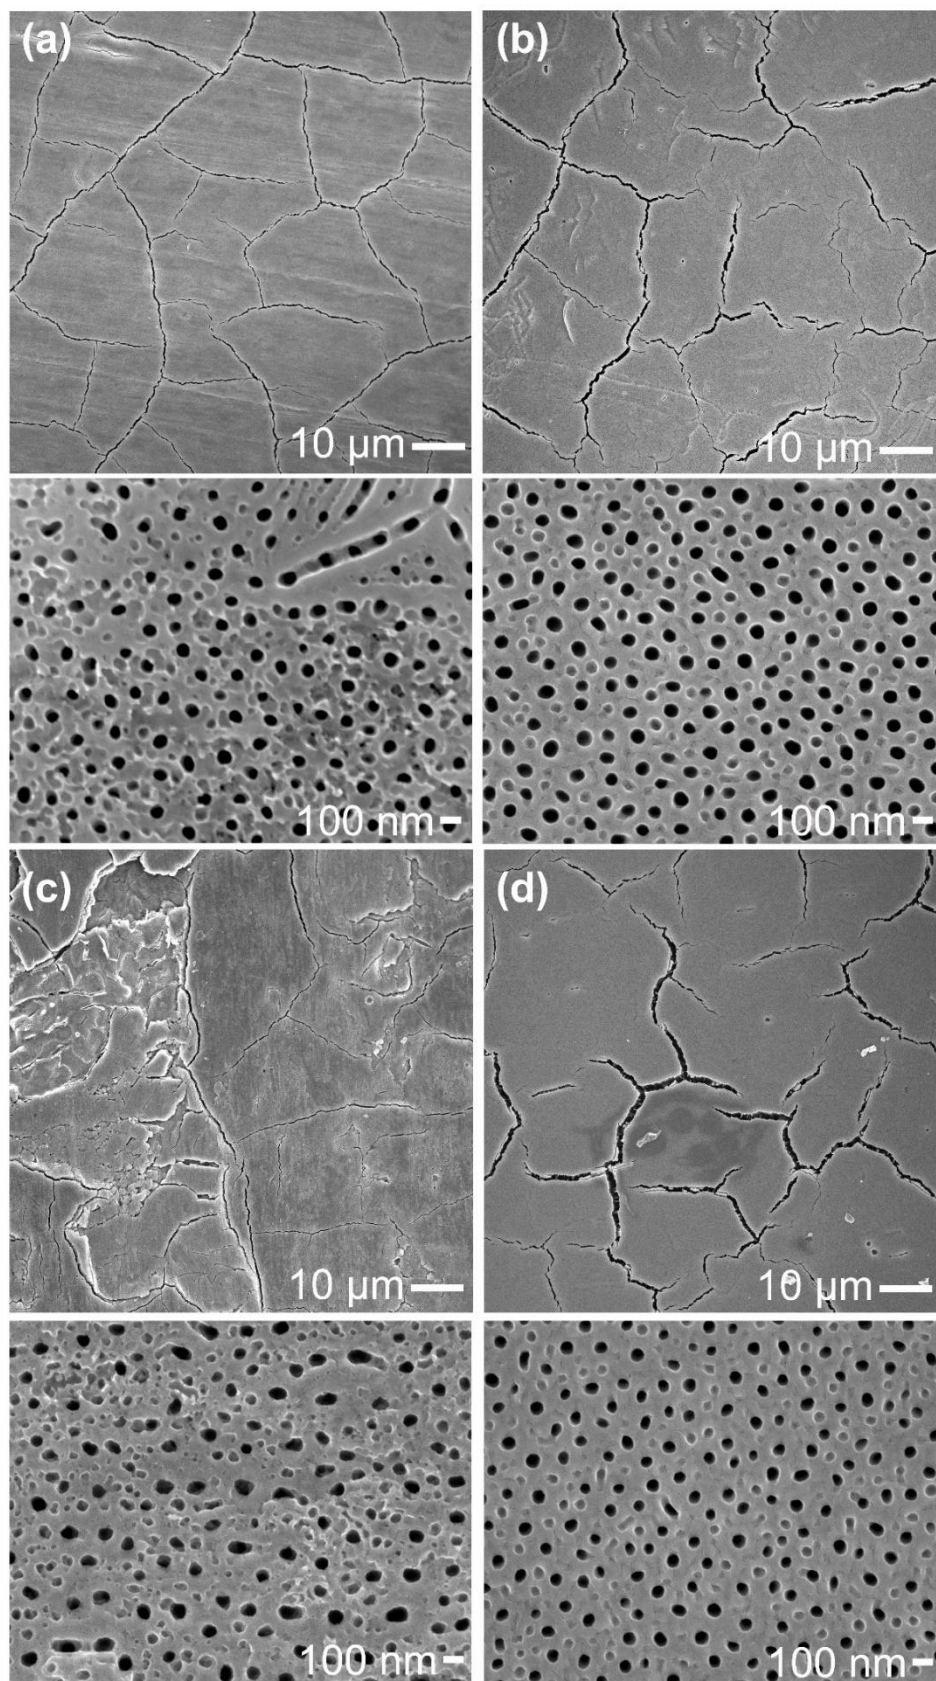

**Figure S5.** SEM images of the top surface of the annealed TiO<sub>2</sub> nanotube arrays. (a) Untreated and (b) electropolished titanium foil from Supplier 1. (c) Untreated and (d) electropolished titanium foil from Supplier 2.

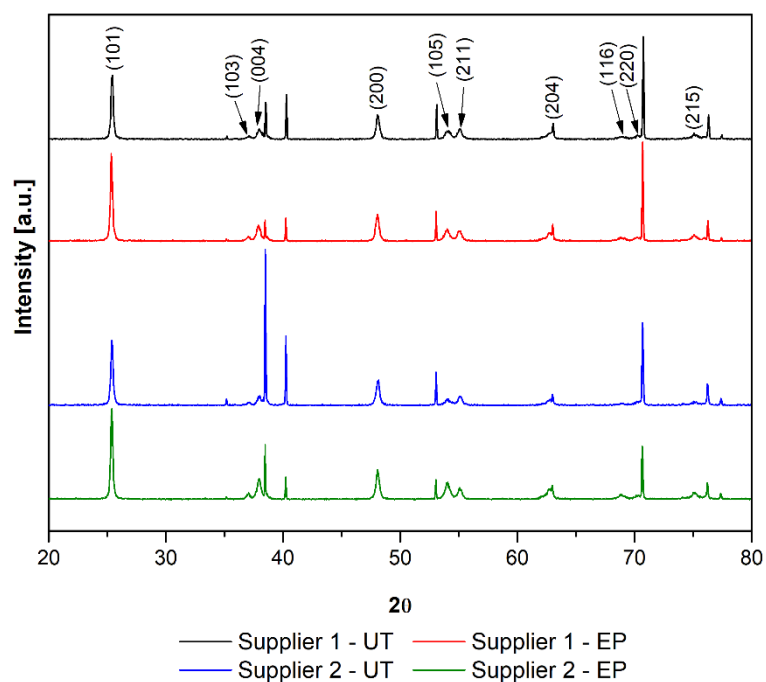

**Figure S6.** XRD patterns of annealed TiO<sub>2</sub> nanotube layers for untreated and electropolished samples of both suppliers. Unmarked peaks correspond to the titanium foil.

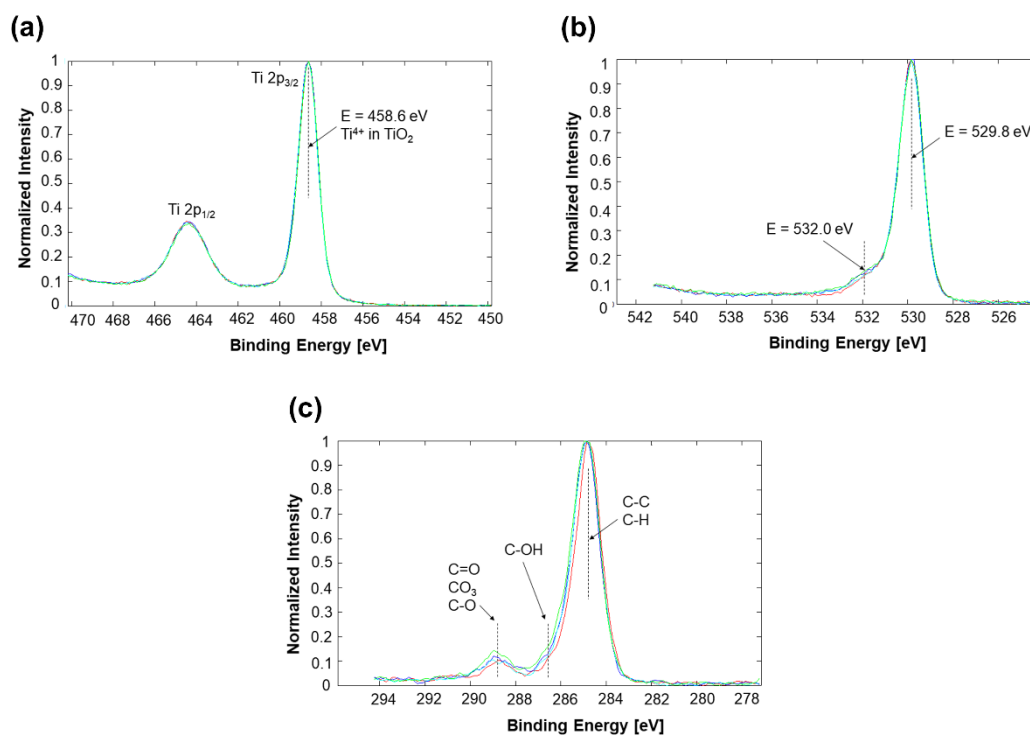

**Figure S7.** (a) Ti 2p, (b) O 1s and (c) C 1s spectrums from XPS measurement.



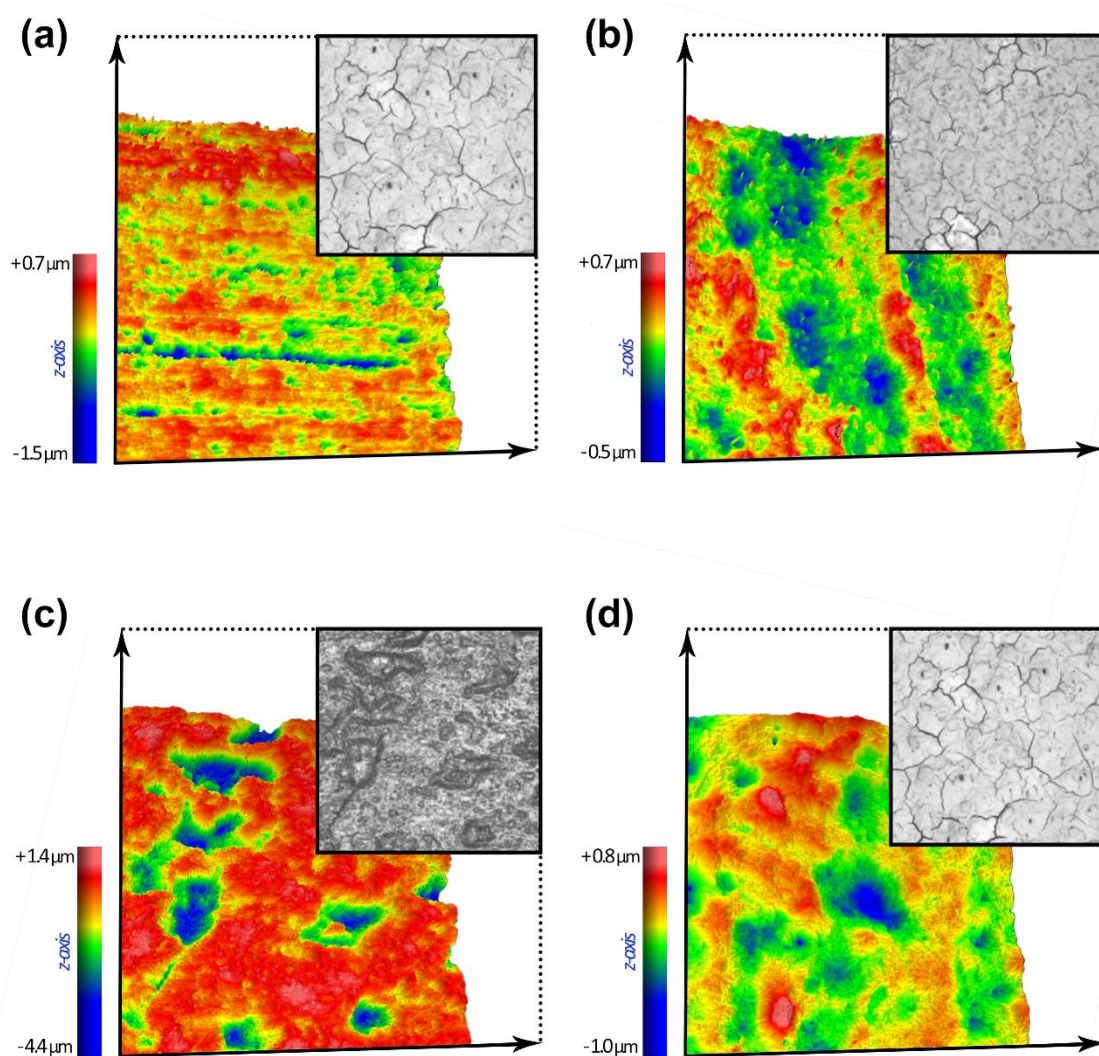

**Figure S8.** Average roughness evaluated over the complete 3D surface roughness of TiO<sub>2</sub> nanotube layers. (a) Untreated and (b) electropolished sample from Supplier 1 and (c) untreated and (d) electropolished sample from Supplier 2 are shown. Each inset is showing a captured TiO<sub>2</sub> nanotube layer surface as seen through camera on optical profiler.

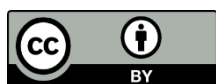

© 2020 by the authors. Submitted for possible open access publication under the terms and conditions of the Creative Commons Attribution (CC BY) license (<http://creativecommons.org/licenses/by/4.0/>).
